# Supplementary material for: Morpho-histological characterisation of the alimentary canal of an important food fish, Asian seabass (Lates calcarifer)
Source: PeerJ. 2016 Aug 24;4:e2377. doi: 10.7717/peerj.2377 (PMC5012279; doi:10.7717/peerj.2377)
Supplement: Table S2 [file peerj-04-2377-s003.xlsx]

## Sheet: Sheet1
Suplementary Table 2. Glycoprotein histochemistry of the Asian seabass digestive tract.
Staining	Interpretation of staining reactions	Esophagus	Stomach	Pyloric Caeca	Anterior Intestine	Mid Intestine	Posterior Intestine	Anterior Rectum	Posterior Rectum
PAS	Neutral glycoprotein’s	+++	+++	+++	+++	+++	+++	+++	+++
PAS-AB	Neutral and acidic glycoprotein	+++	-	-	+++	+++	+++	+++	+++
a-Amylase - PAS	Glycoproteins with oxidizable vicinal diols	+++	+++	++	+++	+++	+++	+++	+++
Acetylation –PAS	Glycoproteins with oxidizable vicinal diols and/or glycogen	-	-	-	-	-	-	-	-
Acetylation-Saponification-PAS	Glycoproteins with oxidizable vicinal diols and/or glycogen	+++	+++	++	+++	+++	+++	+++	+++
Alcian Blue pH 2.5	Glycoproteins with carboxyl groups (sialic acid or urinic acid) and/or with O-sulphate esters	+++	+	-	+++	+++	+++	+++	+++
Alcian Blue pH 1.0	Glycoproteins with O-sulphate esters	+++	+	-	+++	+++	+++	+++	+++
Alcian Blue pH 0.5	Very sulphated Glycoproteins	++	+	-	++	++	++	++	++
strongly positive: +++; moderate positive: ++; weakly positive: +; negative: -
